# Supplementary material for: Promoting photocatalytic hydrogen evolution over the perovskite oxide Pr0.5(Ba0.5Sr0.5)0.5Co0.8Fe0.2O3 by plasmon-induced hot electron injection
Source: Royal Society of Chemistry journal article supplement (doi:10.1039/c9nr10247g), 2020-01-01
Supplement: c9nr10247g1.pdf [file c9nr10247g1.pdf]

## Supporting Information

### Promoting photocatalytic hydrogen evolution over perovskite oxide of $\text{Pr}_{0.5}(\text{Ba}_{0.5}\text{Sr}_{0.5})_{0.5}\text{Co}_{0.8}\text{Fe}_{0.2}\text{O}_3$ by plasmon-induced hot electron injection

Zhishan Li<sup>a</sup>, Qimeng Zhang<sup>b</sup>, Jian-Gang Li<sup>a</sup>, Huachuan Sun<sup>a</sup>, Muk-Fung Yuen<sup>c,d,e</sup>, Shenglin Jiang<sup>a</sup>, Yang Tian<sup>b\*</sup>, Guo Hong<sup>c, d\*</sup>, Chundong Wang<sup>a,f\*</sup>, Meilin Liu<sup>g</sup>

<sup>a</sup> School of Optical and Electronic Information, Wuhan National Laboratory for Optoelectronics, Huazhong University of Science and Technology, Wuhan 430074, P.R. China

<sup>b</sup> Department of Chemistry, Capital Normal University, Beijing 100048, P.R. China

<sup>c</sup> Institute of Applied Physics and Materials Engineering, University of Macau, Macao SAR, P.R. China

<sup>d</sup> Department of Physics and Chemistry, Faculty of Science and Technology, University of Macau, Macao SAR, P.R. China

<sup>e</sup> School of Science and Engineering, The Chinese University of Hong Kong, Shenzhen, Shenzhen, Guangdong, 518172, P.R. China

<sup>f</sup> College of Life Science, Tarim University, Alaer 843300, PR China

<sup>g</sup> School of Materials Science and Engineering, Georgia Institute of Technology, Atlanta, GA 30332-0245, USA

---

\* Corresponding author

E-mail address: apcdwang@hust.edu.cn (C. Wang); tianyang@cnu.edu.cn (Y. Tian); ghong@um.edu.mo (G. Hong)

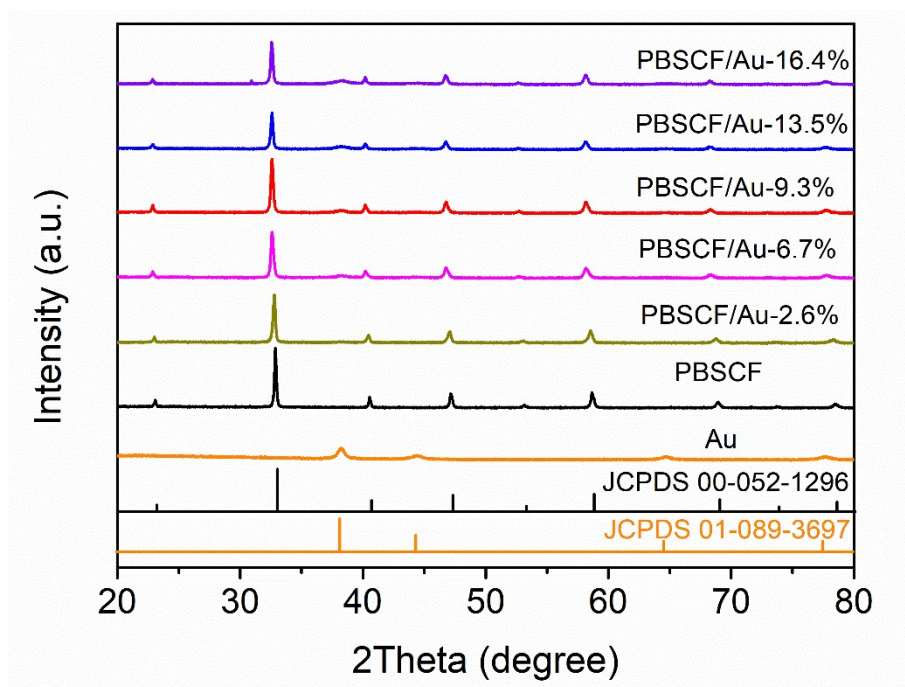

**Fig. S1** XRD patterns of the as-prepared PBSCF/Au composites with different amount of Au loading.

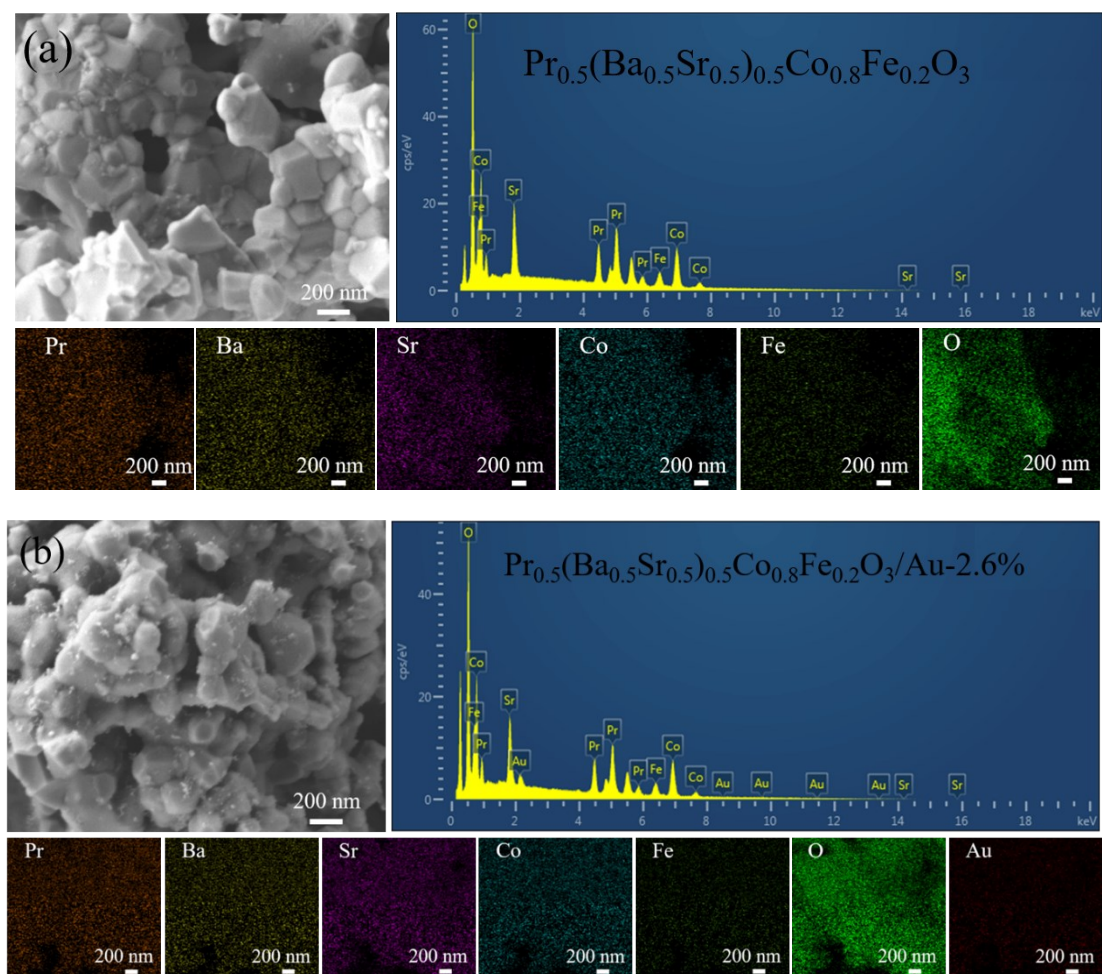

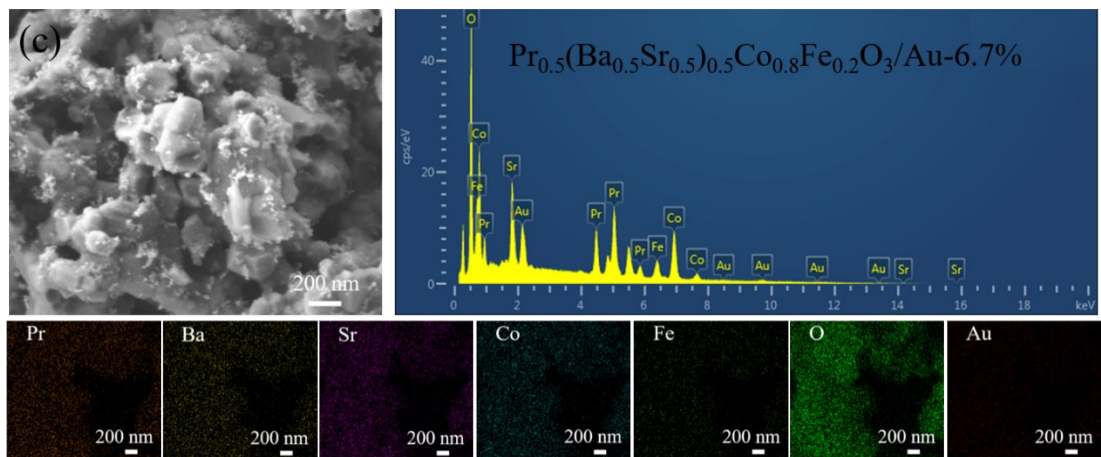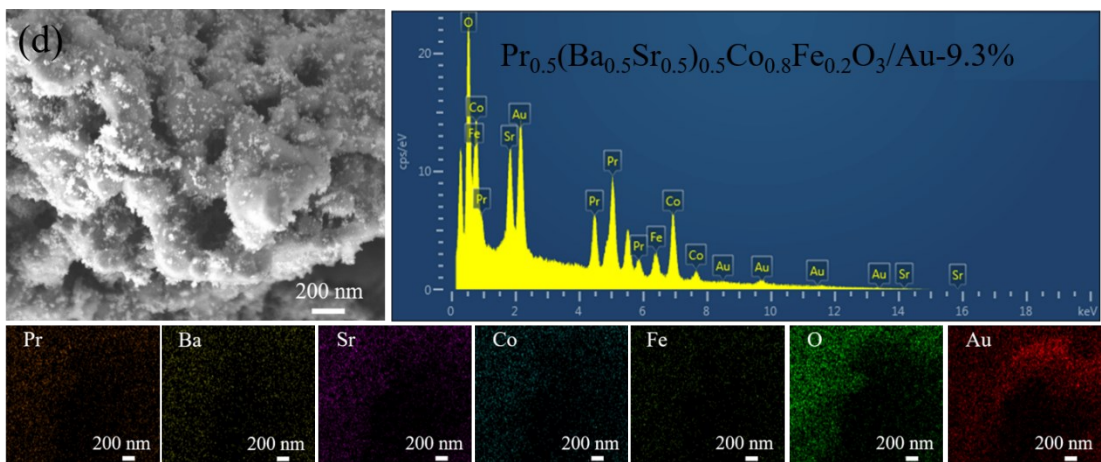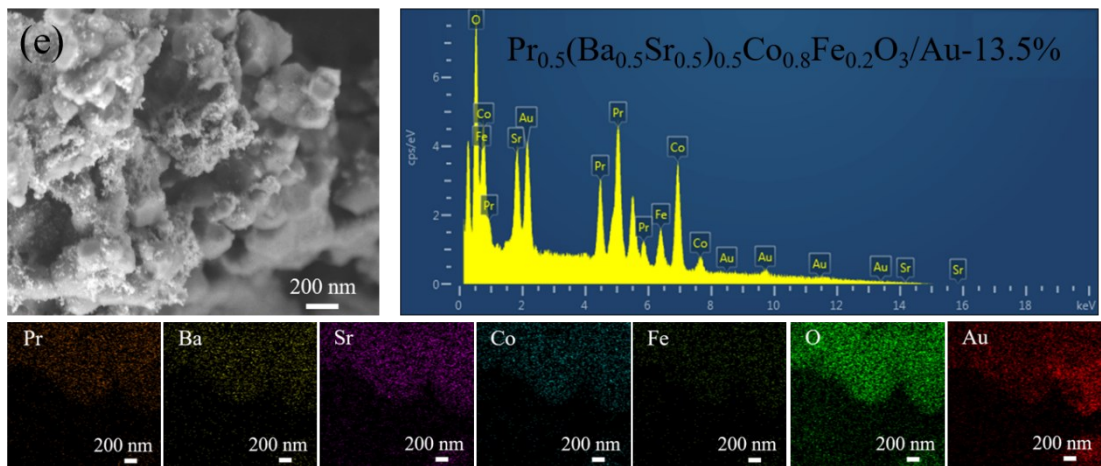



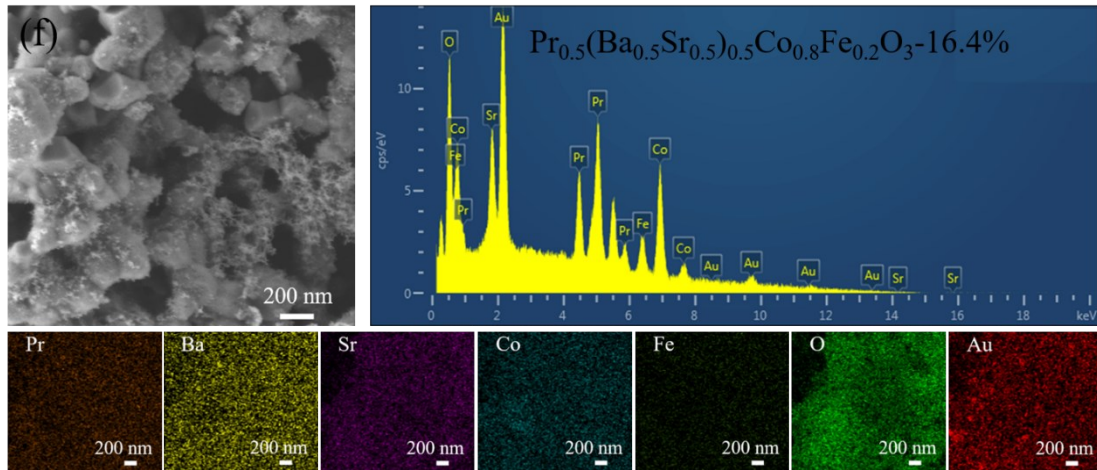

**Fig. S2** SEM, EDS and corresponding elemental mapping images of (a)  $\text{Pr}_{0.5}(\text{Ba}_{0.5}\text{Sr}_{0.5})_{0.5}\text{Co}_{0.8}\text{Fe}_{0.2}\text{O}_3$ , (b)  $\text{Pr}_{0.5}(\text{Ba}_{0.5}\text{Sr}_{0.5})_{0.5}\text{Co}_{0.8}\text{Fe}_{0.2}\text{O}_3/\text{Au}$ -2.6%, (c)  $\text{Pr}_{0.5}(\text{Ba}_{0.5}\text{Sr}_{0.5})_{0.5}\text{Co}_{0.8}\text{Fe}_{0.2}\text{O}_3/\text{Au}$ -6.7%, (d)  $\text{Pr}_{0.5}(\text{Ba}_{0.5}\text{Sr}_{0.5})_{0.5}\text{Co}_{0.8}\text{Fe}_{0.2}\text{O}_3/\text{Au}$ -9.3%, (e)  $\text{Pr}_{0.5}(\text{Ba}_{0.5}\text{Sr}_{0.5})_{0.5}\text{Co}_{0.8}\text{Fe}_{0.2}\text{O}_3/\text{Au}$ -13.5%, (f)  $\text{Pr}_{0.5}(\text{Ba}_{0.5}\text{Sr}_{0.5})_{0.5}\text{Co}_{0.8}\text{Fe}_{0.2}\text{O}_3/\text{Au}$ -16.4%.

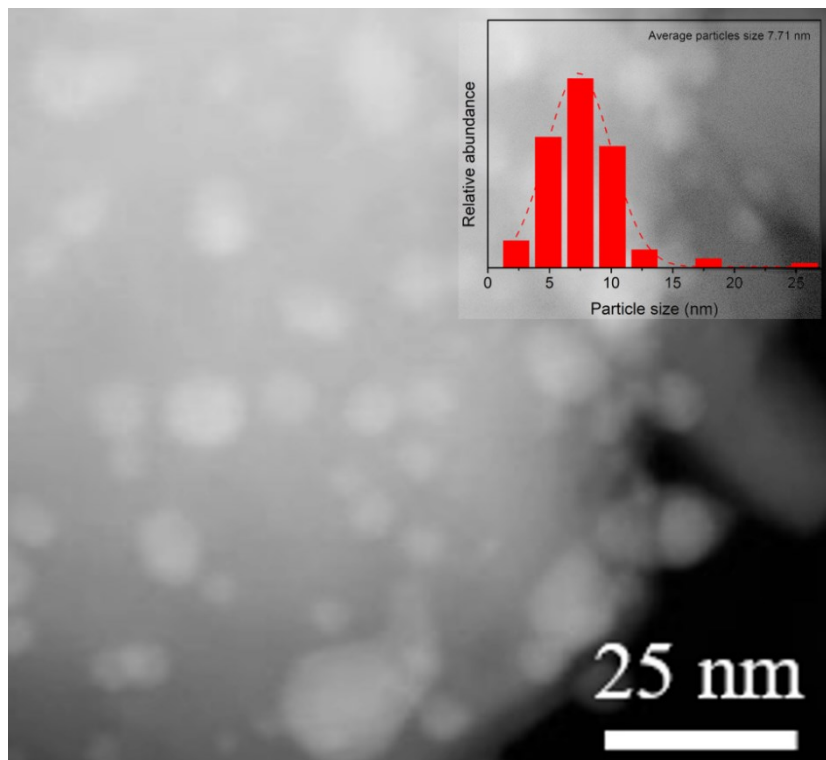

**Fig. S3** The size distribution of Au nanoparticles on XXX.

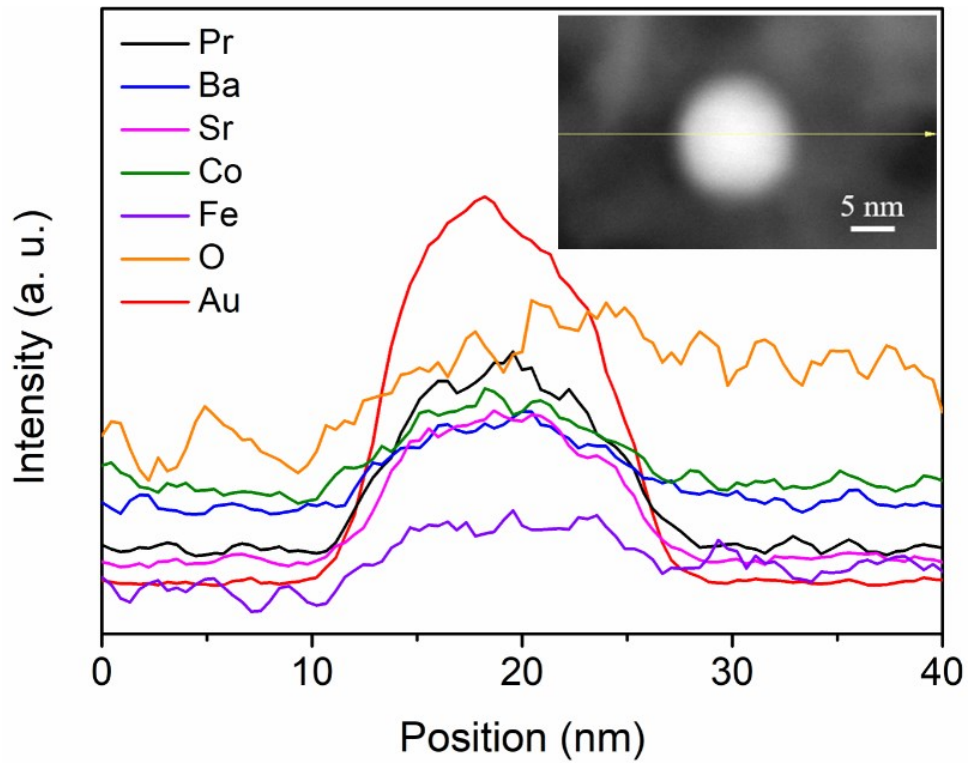

**Fig. S4** The linear scan of PBSCF/Au-9.3%.

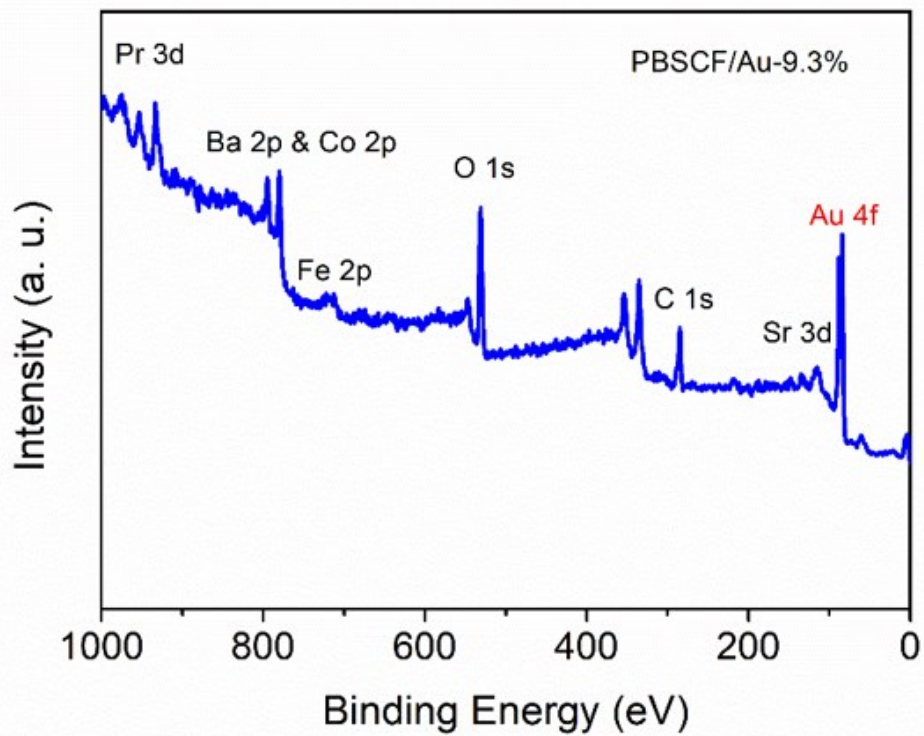

**Fig. S5** XPS survey spectra of  $\text{Pr}_{0.5}(\text{Ba}_{0.5}\text{Sr}_{0.5})_{0.5}\text{Co}_{0.8}\text{Fe}_{0.2}\text{O}_3/\text{Au-9.3\%}$ .

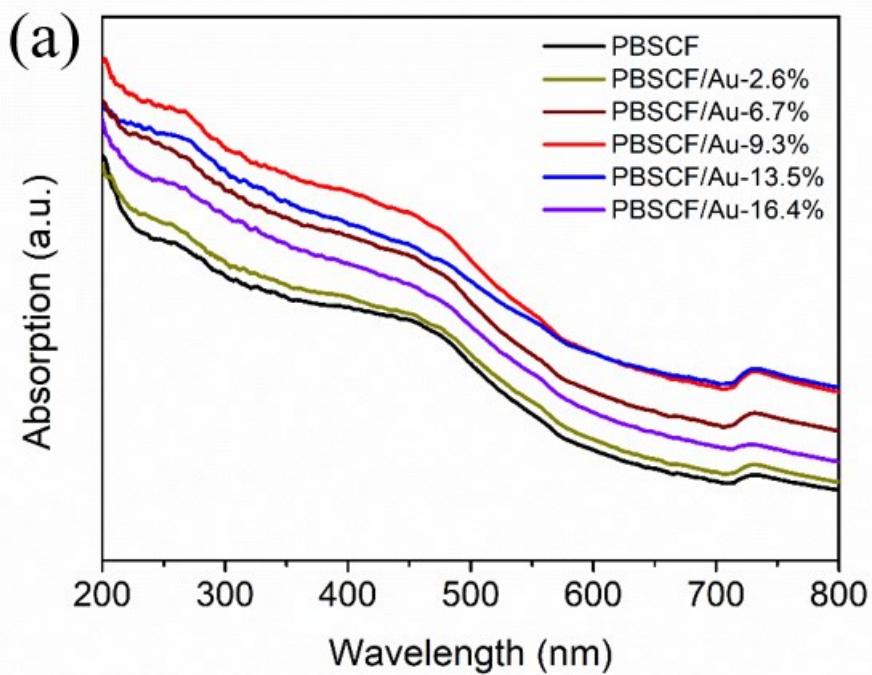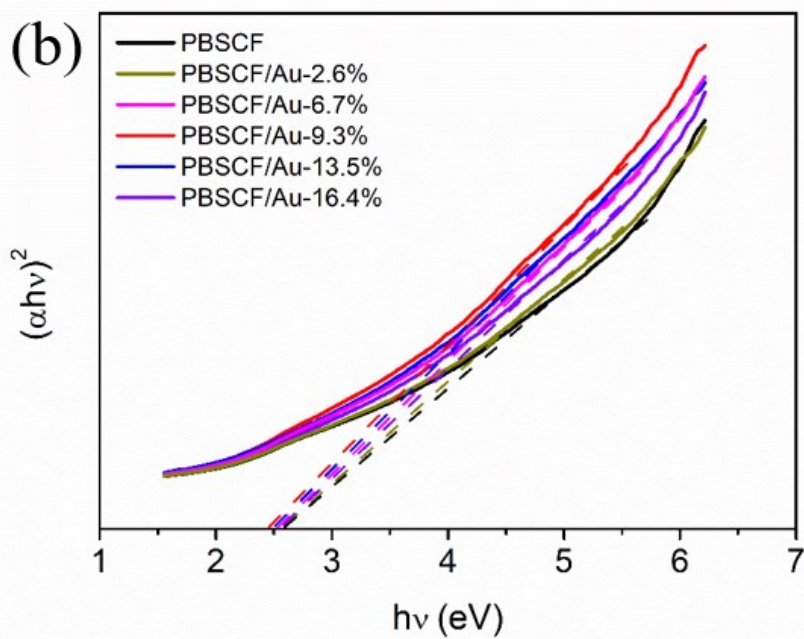

**Fig. S6** (a) Absorption spectra of the as-prepared PBSCF/Au composites with different loading amount of Au. (b) Corresponding optical band gaps of PBSCF/Au composites determined by Tuac's equation.

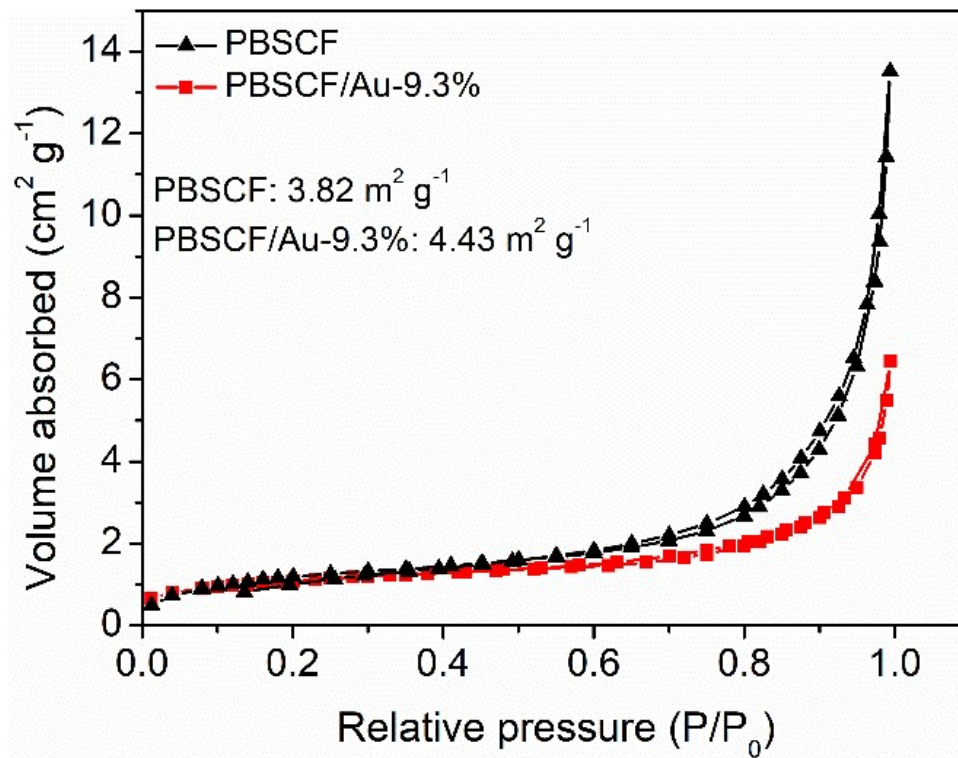

**Fig. S7** The BET of PBSCF and PBSCF/Au-9.3%.

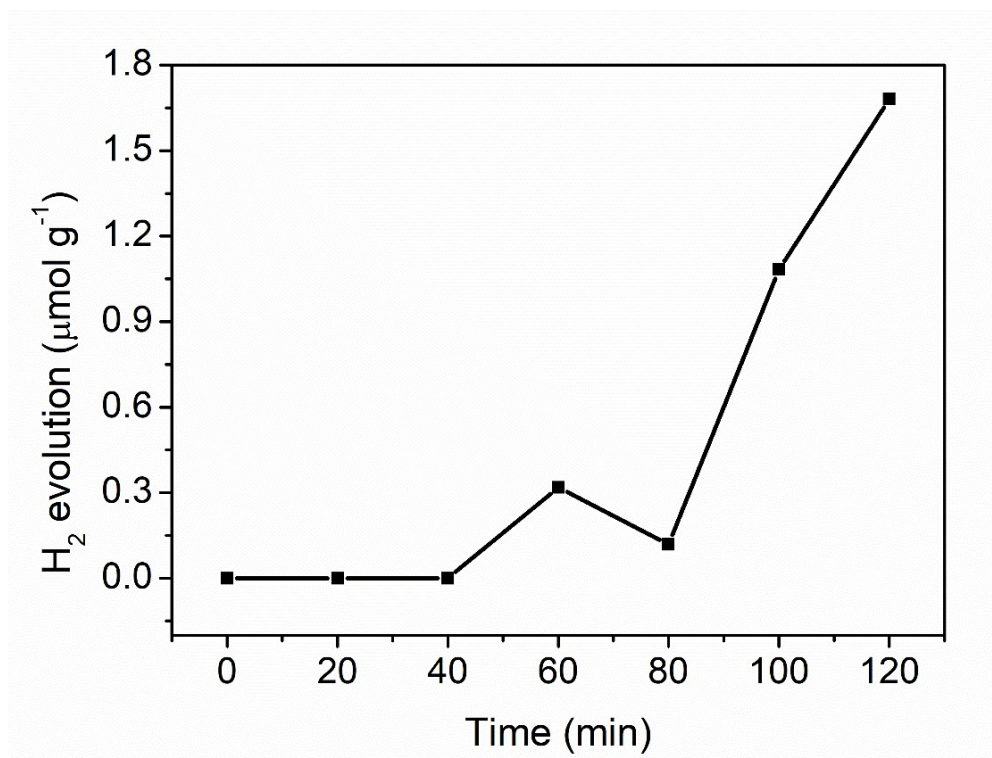

**Fig. S8** Photocatalytic hydrogen evolution rates of bare Formaldehyde aqueous solution.



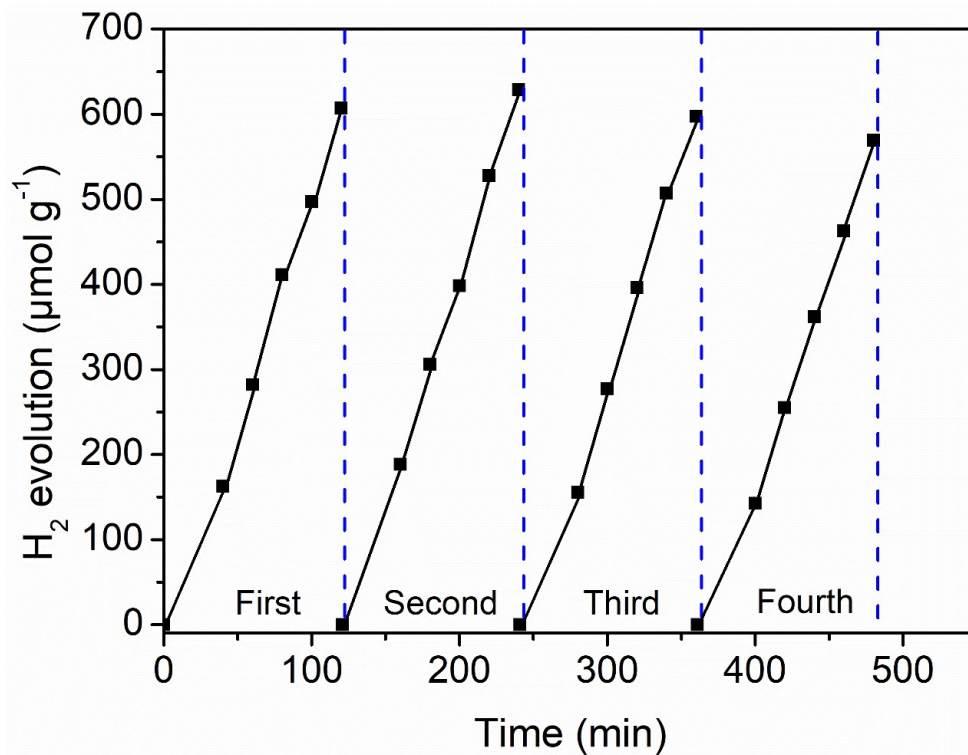

**Fig. S9** Cycling performance of  $\text{Pr}_{0.5}(\text{Ba}_{0.5}\text{Sr}_{0.5})_{0.5}\text{Co}_{0.8}\text{Fe}_{0.2}\text{O}_3/\text{Au}-9.3\%$  under the illumination of visible light ( $\lambda > 420 \text{ nm}$ ).

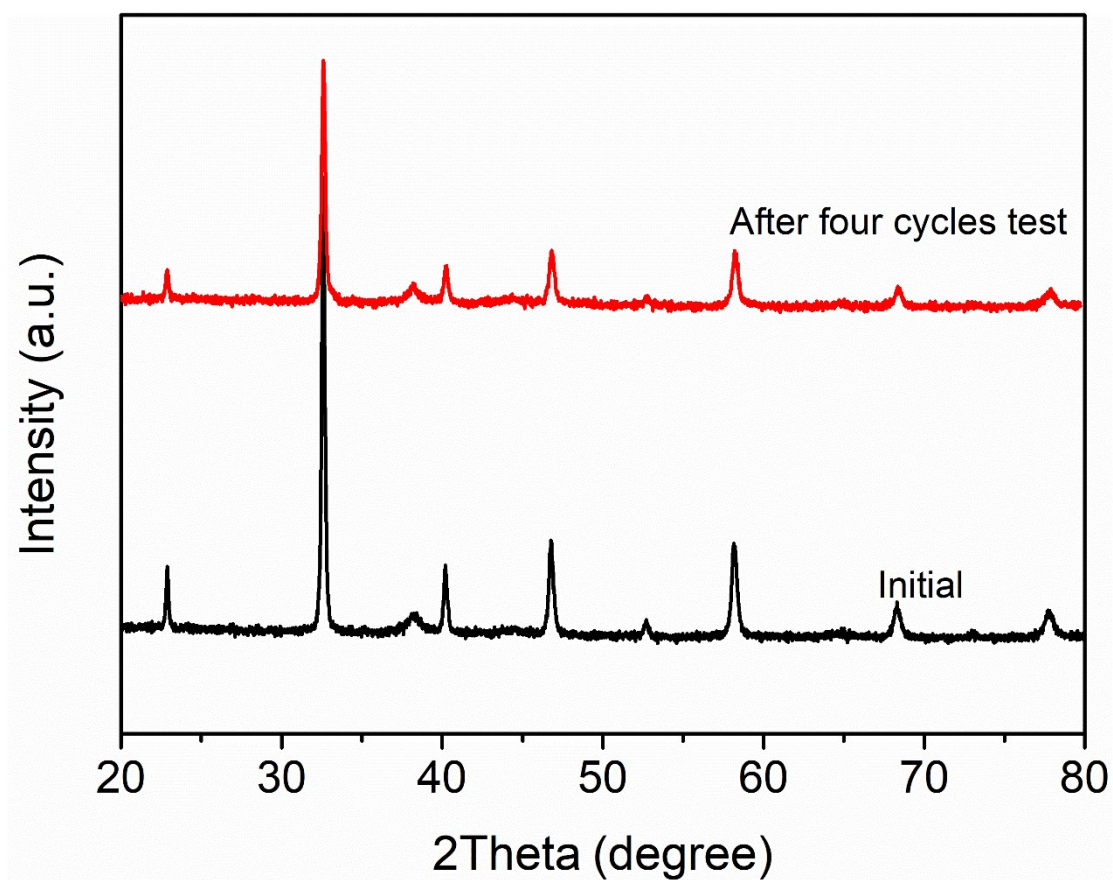

**Fig. S10** XRD patterns of  $\text{Pr}_{0.5}(\text{Ba}_{0.5}\text{Sr}_{0.5})_{0.5}\text{Co}_{0.8}\text{Fe}_{0.2}\text{O}_3/\text{Au}-9.3\%$  and the one that



after stability test.

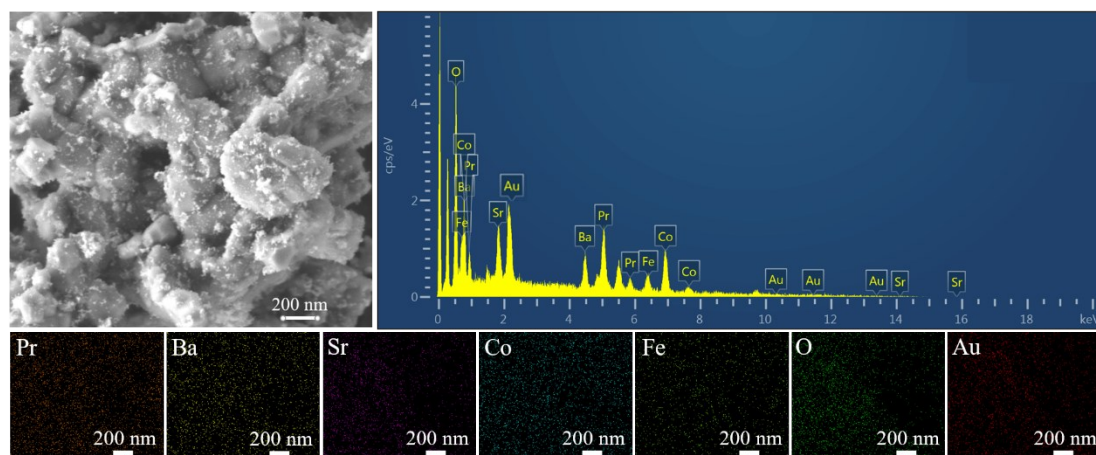

**Fig. S11** SEM, EDS and corresponding elemental mapping images of  $\text{Pr}_{0.5}(\text{Ba}_{0.5}\text{Sr}_{0.5})_{0.5}\text{Co}_{0.8}\text{Fe}_{0.2}\text{O}_3/\text{Au}-9.3\%$  that after stability test.

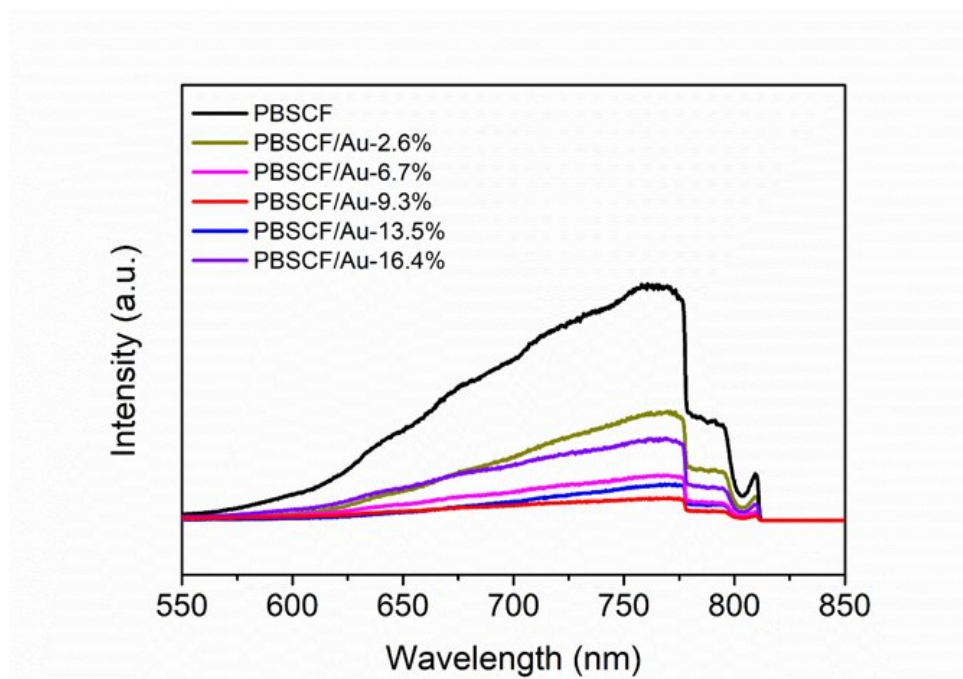

**Fig. S12** Photoluminescence spectra of the as-prepared PBSCF/Au composites with different amount of Au loading.

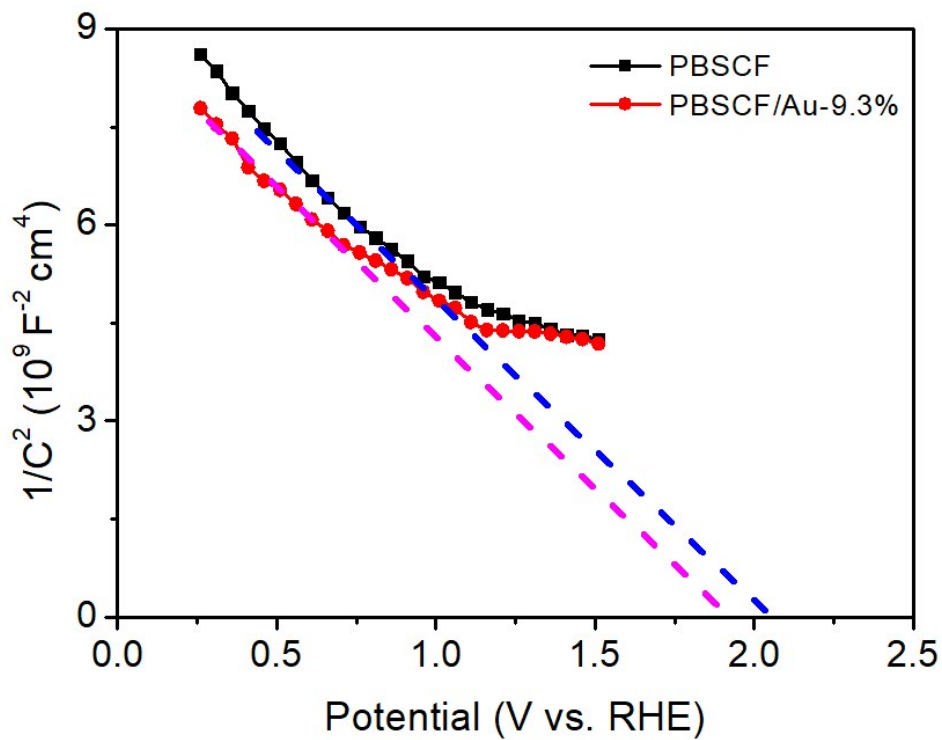

Fig. S13 Mott-Schottky characteristic of bare PBSCF and PBSCF/Au-9.3%.

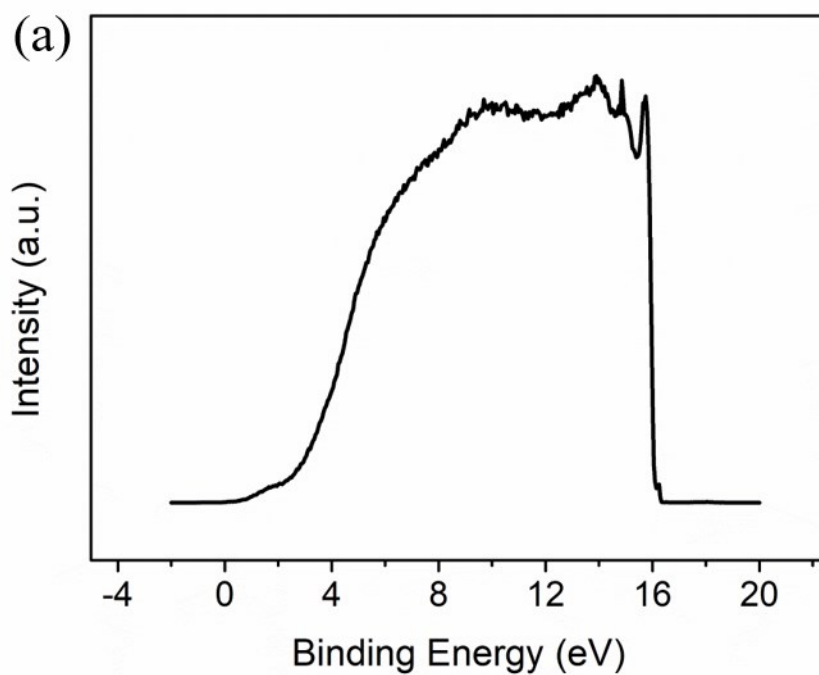

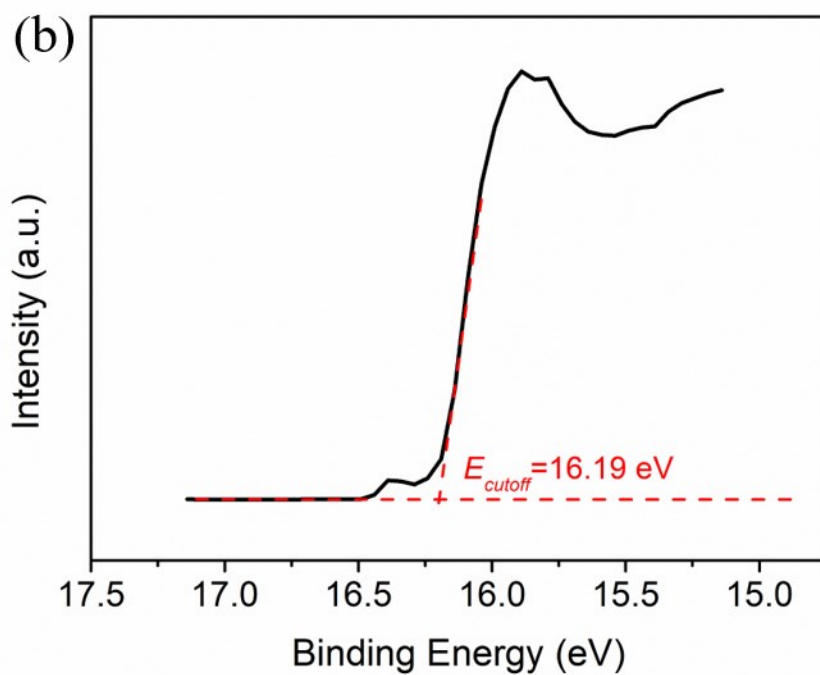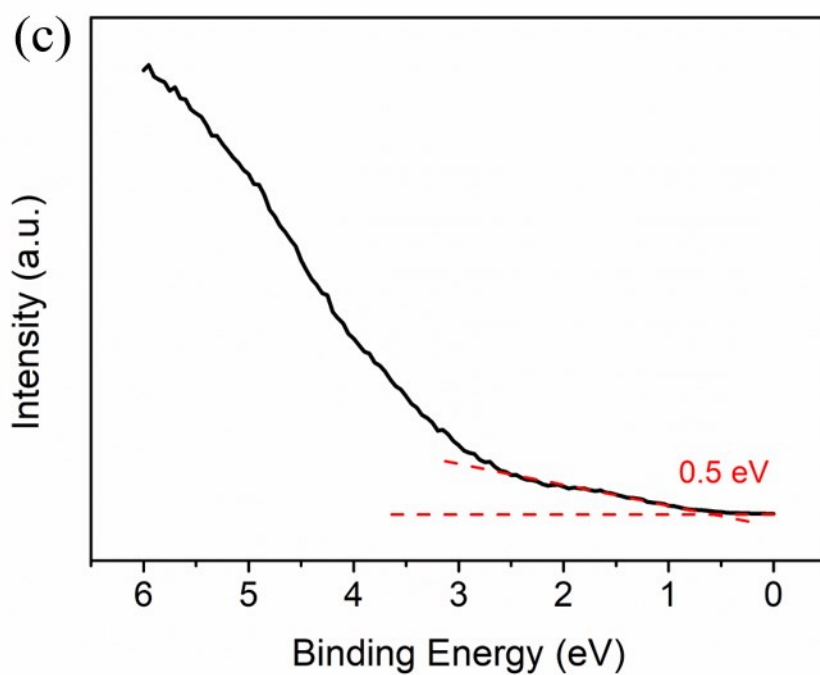

**Fig. S14** (a) UPS spectrum of bare  $\text{Pr}_{0.5}(\text{Ba}_{0.5}\text{Sr}_{0.5})_{0.5}\text{Co}_{0.8}\text{Fe}_{0.2}\text{O}_3$ , (b) the corresponding electron cutoff energies and (c) the valence band position determined from UPS spectrum.



**Table S1.** Comparison of hydrogen evolution efficiency of our as-prepared catalyst with the reported ones

| Catalysts                                                                                        | Yield of H <sub>2</sub> (μ mol g <sup>-1</sup> h <sup>-1</sup> ) | References       |
|--------------------------------------------------------------------------------------------------|------------------------------------------------------------------|------------------|
| <b>PBSCF/Au-9.3%</b>                                                                             | <b>1618.0</b>                                                    | <b>This work</b> |
| LaCoO <sub>3</sub> -0.5% Au                                                                      | 42.0                                                             | 1                |
| Ca <sub>0.8</sub> La <sub>0.2</sub> Ti <sub>0.8</sub> Cr <sub>0.2</sub> O <sub>3</sub> +1 wt% Pt | 495.1                                                            | 2                |
| SrTiO <sub>3</sub> :Rh(1%)+Pt(0.1 wt %)                                                          | 300.0                                                            | 3                |
| CaTi <sub>0.99</sub> Cu <sub>0.01</sub> O <sub>3</sub>                                           | 784.2                                                            | 4                |
| CaTi <sub>0.98</sub> Cu <sub>0.02</sub> O <sub>3</sub>                                           | 1447.8                                                           | 4                |
| CaTi <sub>0.97</sub> Cu <sub>0.03</sub> O <sub>3</sub>                                           | 358.6                                                            | 4                |
| LaNi <sub>0.7</sub> Cu <sub>0.3</sub> O <sub>3</sub>                                             | 582.0                                                            | 5                |
| SrTiO <sub>3</sub> /Fe <sub>2</sub> O <sub>3</sub>                                               | 85.0                                                             | 6                |
| SrTiO <sub>3</sub> /BiFeO <sub>3</sub>                                                           | 129.0                                                            | 6                |
| LaNiO <sub>3</sub> /CdS                                                                          | 3700.0                                                           | 7                |

1. B.-T. Zhang, J. Liu, S. Yue, Y. Teng, Z. Wang, X. Li, S. Qu and Z. Wang, *Appl. Catal., B*, 2017, **219**, 432-438.
2. R. Wang, S. Ni, G. Liu and X. Xu, *Appl. Catal., B*, 2018, **225**, 139-147.
3. R. Konta, T. Ishii, H. Kato and A. Kudo, *J. Phys. Chem. B*, 2004, **108**, 8992-8995.
4. H. Zhang, G. Chen, Y. Li and Y. Teng, *Int. J. Hydrogen Energy*, 2010, **35**, 2713-2716.
5. J. Li, L. Jia, W. Fang and J. Zeng, *Int. J. Hydrogen Energy*, 2010, **35**, 5270-5275.
6. J. Luo and P. A. Maggard, *Adv. Mater.*, 2006, **18**, 514-517.
7. J. Xu, C. Sun, Z. Wang, Y. Hou, Z. Ding and S. Wang, *Chem.–Eur. J.*, 2018, **24**, 18512-18517.
